# Supplementary material
Source: PubMed Central journal article supplement (PMC7970591)
Supplement: jcsm.8514.ds001.pdf [file jcsm.8514.ds001.pdf]

**Table S1:** Sleep disorder medication classes and studied medications

| <b>Medication Class</b>                          | <b>Studied Medications</b>                        |
|--------------------------------------------------|---------------------------------------------------|
| Benzodiazepines                                  | Temazepam<br>Flurazepam<br>Estazolam<br>Triazolam |
| Hypnotics                                        | Zolpidem<br>Zaleplon<br>Eszopiclone               |
| Tricyclic antidepressants                        | Doxepin                                           |
| Antihistamines                                   | Diphenhydramine<br>Doxylamine<br>Hydroxyzine      |
| Melatonin receptor agonists                      | Ramelteon                                         |
| Orexin receptor antagonists                      | Suvorexant                                        |
| Alpha <sub>2</sub> -adrenergic receptor agonists | Clonidine<br>Guanfacine                           |
| Serotonin antagonist and reuptake inhibitors     | Trazodone                                         |
| Tetracyclic antidepressants                      | Mirtazapine                                       |
